# Supplementary material for: Structural connectivity changes in temporal lobe epilepsy: Spatial features contribute more than topological measures
Source: PubMed Central journal article supplement (PMC4473265; doi:10.1016/j.nicl.2015.02.004), 2015-02-20

# Patient / control differences in Euclidean distance between ROI when total brain surface area is included as a regressor.

Significant after FDR ( $p < 0.00015$ )

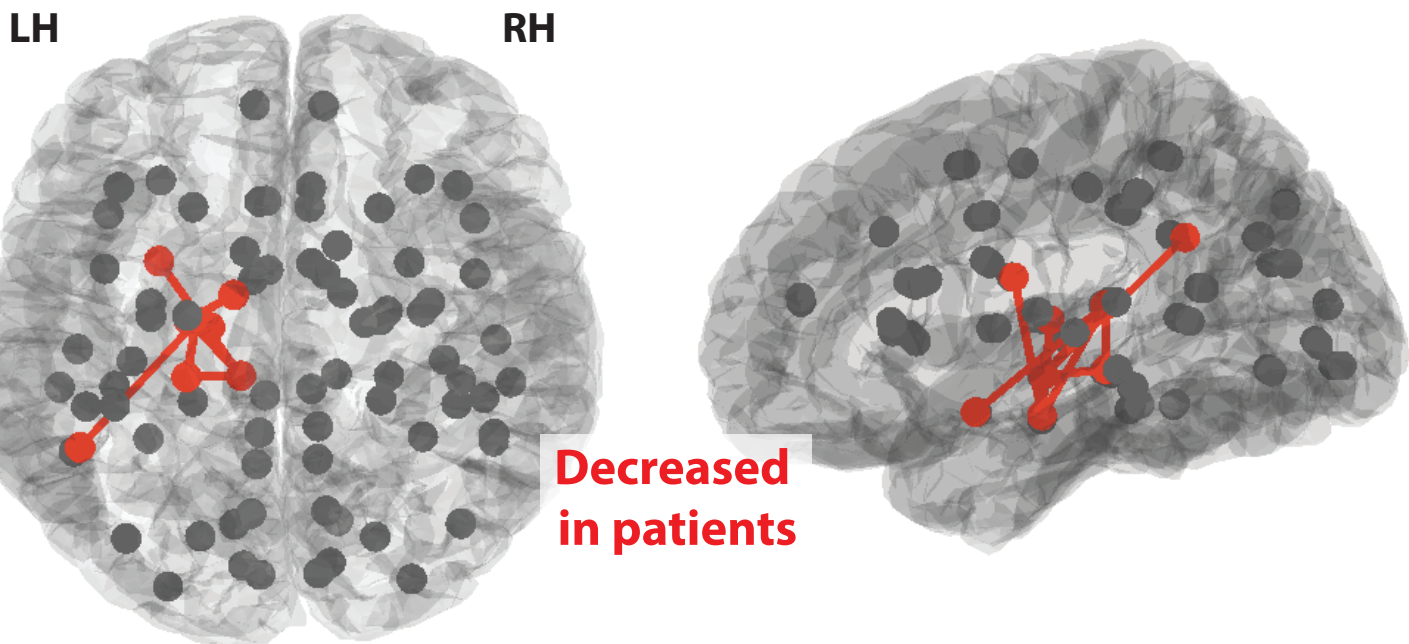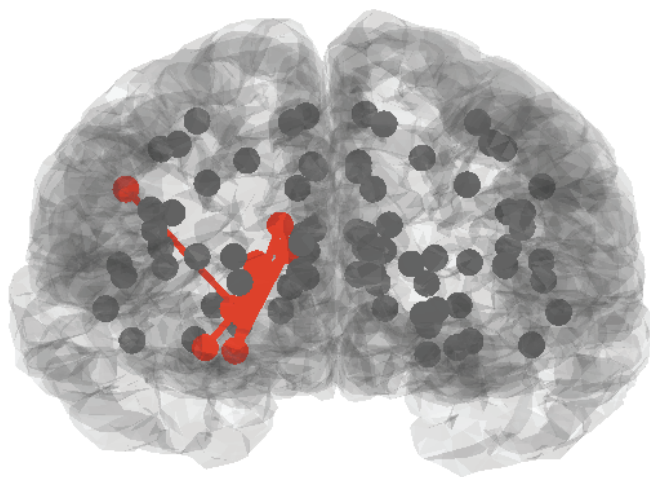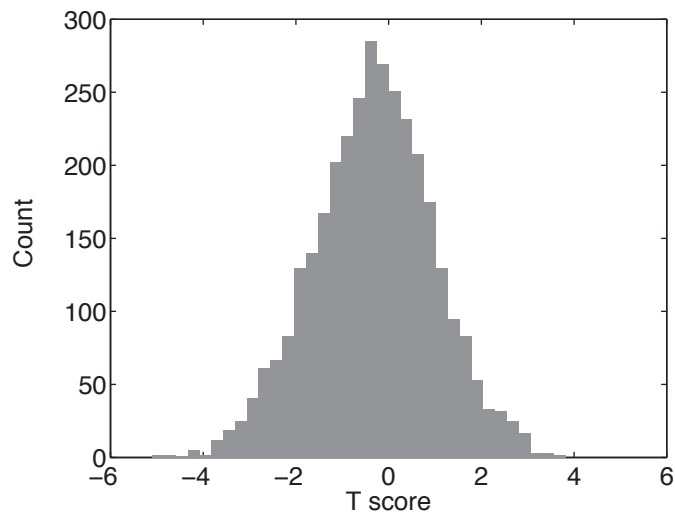

Supplement: mmc1.pdf [file mmc1.pdf]
