# Supplementary material for: Structural connectivity changes in temporal lobe epilepsy: Spatial features contribute more than topological measures
Source: PubMed Central journal article supplement (PMC4473265; doi:10.1016/j.nicl.2015.02.004), 2015-02-20

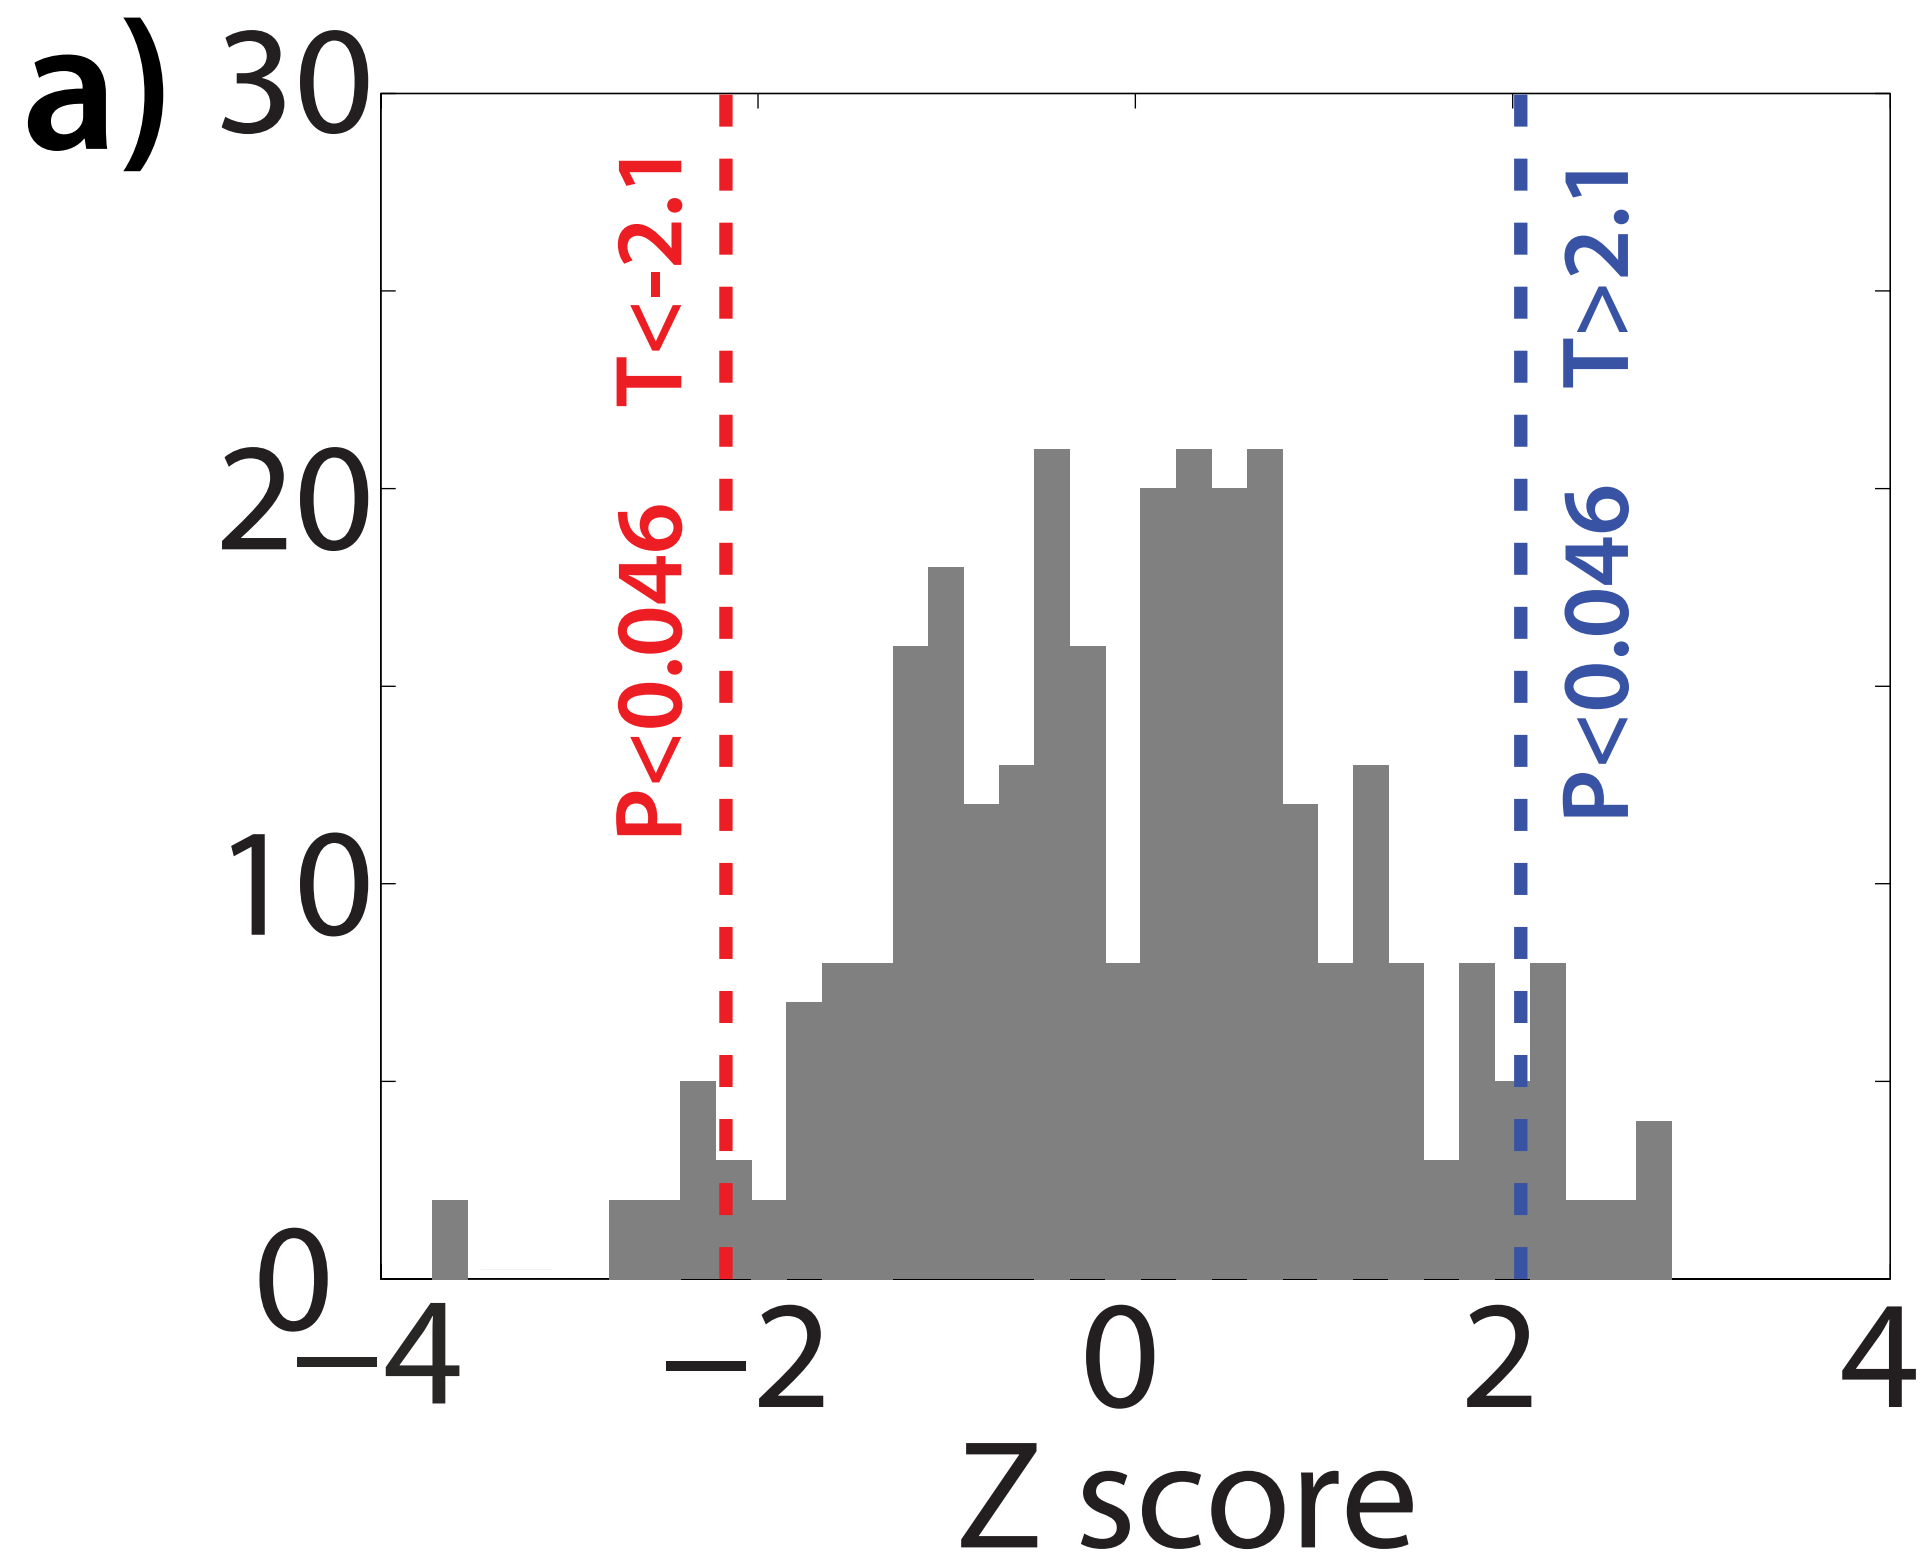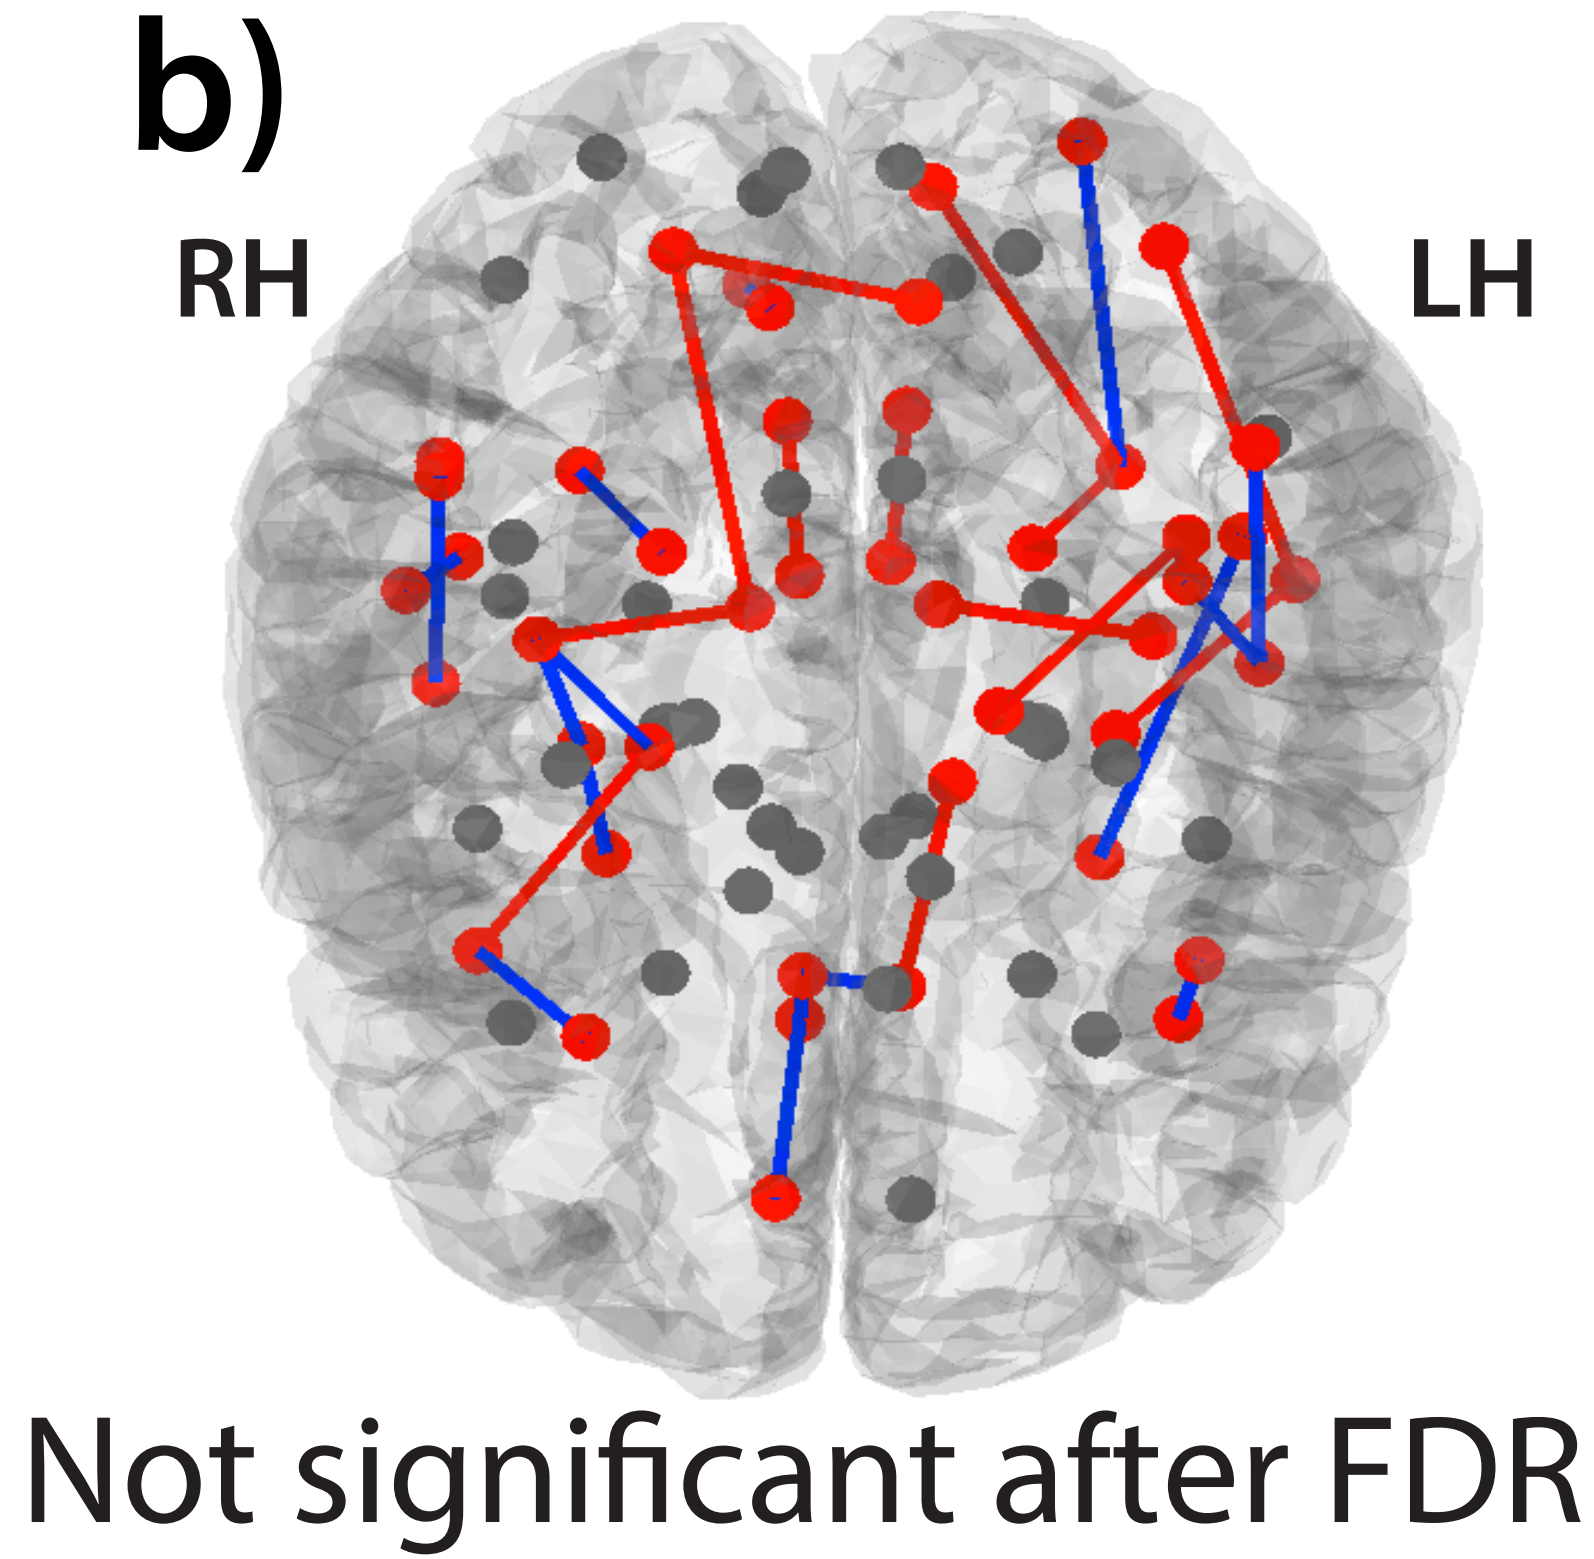

Supplement: mmc3.pdf [file mmc3.pdf]
